# Supplementary material for: Anti-infection effects of heparin on SARS-CoV-2 in a diabetic mouse model
Source: PubMed Central journal article supplement — Zool Res. 2023 Nov 18;44(6):1003–14. doi: 10.24272/j.issn.2095-8137.2023.108 (PMC10802103; doi:10.24272/j.issn.2095-8137.2023.108), 2023-11-18
Supplement: zr-44-1003-S1.pdf [file zr-44-1003-S1.pdf]

## Supplementary Materials

### Anti-infection effects of heparin on SARS-CoV-2 in a diabetic mouse model

Zhongyun Zhang<sup>1,2,#</sup>, Ning Zhang<sup>3,#</sup>, Xuancheng Lu<sup>4,#</sup>, Min Zhou<sup>5</sup>, Xiaoxiang Yan<sup>6</sup>,  
Weiqiong Gu<sup>1,2</sup>, Jingru Yang<sup>7</sup>, Qin Zhang<sup>4</sup>, Cheng Zhang<sup>3</sup>, Yuhuan Gong<sup>3</sup>, Mingjun  
Jia<sup>3</sup>, Xiaoyu Zhang<sup>3</sup>, Peng Ning<sup>3</sup>, Mei Liu<sup>4</sup>, Xiaoyan Li<sup>4</sup>, Xiaomeng Shi<sup>4</sup>, Wenjun Liu<sup>3,8</sup>,  
George F. Gao<sup>3,4,8</sup>, Guang Ning<sup>1,2</sup>, Jiqui Wang<sup>1,2,\*</sup>, Yuhai Bi<sup>3,7,8,\*</sup>

<sup>1</sup>Department of Endocrinology and Metabolism, China National Research Center for Metabolic Diseases, Ruijin Hospital, Shanghai Jiao Tong University School of Medicine, Shanghai 200025, China

<sup>2</sup>Shanghai National Clinical Research Center for Metabolic Diseases, Key Laboratory for Endocrine and Metabolic Diseases of the National Health Commission of the PR China, Shanghai National Center for Translational Medicine, Shanghai 200025, China

<sup>3</sup>CAS Key Laboratory of Pathogen Microbiology and Immunology, Institute of Microbiology, Center for Influenza Research and Early-warning (CASCIRE), CAS-TWAS Center of Excellence for Emerging Infectious Diseases (CEEID), Chinese Academy of Sciences, Beijing 100101, China

<sup>4</sup>Laboratory Animal Center, Chinese Center for Disease Control and Prevention (China CDC), Beijing 102206, China

<sup>5</sup>Department of Respiratory and Critical Care Medicine, Institute of Respiratory Diseases, Ruijin Hospital, Shanghai Jiaotong University School of Medicine, Shanghai 200025, China

<sup>6</sup>Department of Cardiology, Institute of Cardiovascular Diseases, Ruijin Hospital, Shanghai Jiaotong University School of Medicine, Shanghai 200025, China

<sup>7</sup>School of Laboratory Medicine and Life Sciences, Wenzhou Medical University, Wenzhou, Zhejiang 325000, China

<sup>8</sup>University of Chinese Academy of Sciences, Beijing 100049, China

<sup>#</sup>Authors contributed equally to this work

<sup>\*</sup>Corresponding authors, E-mail: wangjq@shsmu.edu.cn; beeyh@im.ac.cn

**Supplementary Table S1. Characteristics of COVID-19 patients with vs without diabetes at baseline.**

| Characteristic                           | Non-diabetes (291)                 | Missing Data | Diabetes (66)                      | Missing Data | t/Z/x <sup>2</sup> | Test                | P                |
|------------------------------------------|------------------------------------|--------------|------------------------------------|--------------|--------------------|---------------------|------------------|
|                                          | Mean ± SD or median (IQR) or n (%) |              | Mean ± SD or median (IQR) or n (%) |              |                    |                     |                  |
| Age, year, median (IQR)                  | 64.00 (49.00-70.00)                | 0            | 68.00 (59.75–73.25)                | 0            | -2.933             | Mann-Whitney test   | <b>0.003</b>     |
| <b>Sex</b>                               |                                    | 0            |                                    | 0            | 1.120              | Chi-Square tests    | 0.290            |
| Male, n (%)                              | 151 (51.9%)                        | -            | 39 (59.1%)                         | -            |                    |                     |                  |
| Female, n (%)                            | 140 (48.1%)                        | -            | 27 (40.9%)                         | -            |                    |                     |                  |
| Smoking, n (%)                           | 16 (7.1%)                          | 65           | 5 (10.2%)                          | 17           | -                  | Fisher's exact test | 0.551            |
| <b>Comorbidities</b>                     |                                    |              |                                    |              |                    |                     |                  |
| Hypertension, n (%)                      | 92 (31.6%)                         | 0            | 39 (59.1%)                         | 0            | 17.483             | Chi-Square tests    | <b>&lt;0.001</b> |
| Hyperlipemia, n (%)                      | 3 (1.0%)                           | 0            | 3 (4.5%)                           | 0            | -                  | Fisher's exact test | 0.079            |
| CHD, n (%)                               | 27 (9.3%)                          | 0            | 14 (21.2%)                         | 0            | 7.537              | Chi-square tests    | <b>0.006</b>     |
| COPD, n (%)                              | 18 (6.2%)                          | 0            | 8 (12.1%)                          | 0            | -                  | Fisher's exact test | 0.113            |
| CKD, n (%)                               | 7 (2.4%)                           | 0            | 5 (7.6%)                           | 0            | -                  | Fisher's exact test | 0.051            |
| Cancer, n (%)                            | 10 (3.4%)                          | 0            | 2 (3.0%)                           | 0            | -                  | Fisher's exact test | 1.000            |
| <b>Main symptoms of COVID-19</b>         |                                    |              |                                    |              |                    |                     |                  |
| Cough, n (%)                             | 234 (80.4%)                        | 0            | 56 (84.8%)                         | 0            | 0.694              | Chi-square tests    | 0.405            |
| Fever, n (%)                             | 225 (77.3%)                        | 0            | 50 (75.8%)                         | 0            | 0.074              | Chi-square tests    | 0.785            |
| Expectoration, n (%)                     | 153 (52.6%)                        | 0            | 44 (66.7%)                         | 0            | 4.318              | Chi-square tests    | <b>0.038</b>     |
| <b>Main laboratory findings</b>          |                                    |              |                                    |              |                    |                     |                  |
| FBG, mmol/L, median (IQR)                | 5.45 (4.96–6.67)                   | 27           | 7.35 (5.89–9.85)                   | 7            | -5.659             | Mann-Whitney test   | <b>&lt;0.001</b> |
| Hemoglobin, g/L, median (IQR)            | 128.00 (116.00–137.00)             | 3            | 126.00 (115.00–139.00)             | 3            | -0.627             | Mann-Whitney test   | 0.531            |
| RBC count, 10 <sup>9</sup> /L, mean ± SD | 4.09 ± 0.61                        | 3            | 4.08 ± 0.56                        | 3            | 0.046              | t-test              | 0.964            |

|                                                    |                     |    |                      |   |        |                   |              |
|----------------------------------------------------|---------------------|----|----------------------|---|--------|-------------------|--------------|
| WBC count, 10 <sup>9</sup> /L, median (IQR)        | 5.73 (4.45–7.37)    | 4  | 6.14 (4.97–7.75)     | 3 | -1.452 | Mann-Whitney test | 0.146        |
| Lymphocyte count, 10 <sup>9</sup> /L, mean ± SD    | 1.27 ± 0.55         | 3  | 1.29 ± 0.60          | 3 | -0.217 | <i>t</i> -test    | 0.828        |
| Neutrophil count, 10 <sup>9</sup> /L, median (IQR) | 3.68 (2.59–5.20)    | 3  | 4.02 (2.86–5.87)     | 3 | -1.469 | Mann-Whitney test | 0.142        |
| Monocyte count, 10 <sup>9</sup> /L, median (IQR)   | 0.47 (0.36–0.63)    | 3  | 0.49 (0.37–0.67)     | 3 | -1.069 | Mann-Whitney test | 0.285        |
| Platelet count, 10 <sup>9</sup> /L, mean ± SD      | 248.55 ± 104.45     | 3  | 251.39 ± 91.06       | 4 | -0.199 | <i>t</i> -test    | 0.843        |
| CRP, mg/L, median (IQR)                            | 12.00 (1.63–59.10)  | 11 | 8.60 (2.20–80.65)    | 1 | -0.449 | Mann-Whitney test | 0.654        |
| <b>Signs at admission</b>                          |                     |    |                      |   |        |                   |              |
| SpO <sub>2</sub> , %, median (IQR)                 | 97.00 (95.00–99.00) | 27 | 96.00 (92.00–98.00)  | 7 | -2.366 | Mann-Whitney test | <b>0.018</b> |
| RR, bpm, median (IQR)                              | 20.00 (18.00–22.00) | 15 | 20.00 (20.00–22.00)  | 3 | -1.976 | Mann-Whitney test | <b>0.048</b> |
| HR, bpm, median (IQR)                              | 86.50 (78.00–96.00) | 11 | 89.50 (76.00–102.00) | 2 | -0.660 | Mann-Whitney test | 0.509        |
| BT, °C, median (IQR)                               | 36.70 (36.30–37.00) | 19 | 36.60 (36.30–37.00)  | 3 | -0.923 | Mann-Whitney test | 0.356        |
| Death, n (%)                                       | 47 (16.2%)          | 0  | 9 (13.6%)            | 0 | 0.257  | Chi-square tests  | 0.612        |

Note: Bold values represent statistically significant P values.

Abbreviations: CHD, coronary heart disease; COPD, chronic obstructive pulmonary disease; CKD, chronic kidney disease; FBG, fasting blood glucose; RBC, red blood cell; WBC, white blood cell; CRP, C-reactive protein; SpO<sub>2</sub>, oxygen saturation; RR, respiratory rate; HR, heart rate; BT, body temperature; IQR, interquartile range; SD, standard deviation.

**Supplementary Table S2. Characteristics of COVID-19 patients with vs without diabetes at baseline (other clinical features with no statistically significant difference).**

| Characteristic             | Non diabetes (389)                 |              | Diabetes (86)                      |              | t/Z/x <sup>2</sup> | Test                | P     |
|----------------------------|------------------------------------|--------------|------------------------------------|--------------|--------------------|---------------------|-------|
|                            | Mean ± SD or median (IQR) or n (%) | Missing data | Mean ± SD or median (IQR) or n (%) | Missing Data |                    |                     |       |
| Main symptoms of COVID-19  |                                    |              |                                    |              |                    |                     |       |
| Hemoptysis, n (%)          | 8 (2.7%)                           | 0            | 0 (0.0%)                           | 0            | -                  | Fisher's exact test | 0.360 |
| Shortness of breath, n (%) | 106 (36.4%)                        | 0            | 23 (34.8%)                         | 0            | 0.058              | Chi-square tests    | 0.810 |
| Pharyngalgia, n (%)        | 37 (12.7%)                         | 0            | 9 (13.6%)                          | 0            | 0.041              | Chi-square tests    | 0.840 |
| Headache, n (%)            | 43 (14.8%)                         | 0            | 10 (15.2%)                         | 0            | 0.006              | Chi-square tests    | 0.938 |
| Dizzy, n (%)               | 19 (6.5%)                          | 0            | 3 (4.5%)                           | 0            | -                  | Fisher's exact test | 0.777 |
| Muscular soreness, n (%)   | 62 (21.3%)                         | 0            | 14 (21.2%)                         | 0            | <0.001             | Chi-square tests    | 0.987 |
| Weakness, n (%)            | 117 (40.2%)                        | 0            | 24 (36.4%)                         | 0            | 0.332              | Chi-square tests    | 0.564 |
| Pectoralgia, n (%)         | 56 (19.2%)                         | 0            | 10 (15.2%)                         | 0            | 0.598              | Chi-square tests    | 0.439 |
| Chest stuffiness, n (%)    | 126 (43.3%)                        | 0            | 19 (28.8%)                         | 0            | 4.697              | Chi-square tests    | 0.030 |
| Diarrhea, n (%)            | 71 (24.4%)                         | 0            | 15 (22.7%)                         | 0            | 0.082              | Chi-square tests    | 0.774 |
| Nausea and vomiting, n (%) | 41 (14.1%)                         | 0            | 11 (16.7%)                         | 0            | 0.287              | Chi-square tests    | 0.592 |
| Palpitation, n (%)         | 6 (2.1%)                           | 0            | 2 (3.0%)                           | 0            | -                  | Fisher's exact test | 0.644 |
| Main laboratory findings   |                                    |              |                                    |              |                    |                     |       |
| PT, s , median (IQR)       | 13.70 (13.20–14.40)                | 17           | 13.75 (13.00–14.50)                | 6            | -0.197             | Mann-Whitney test   | 0.844 |
| PTA, s, median (IQR)       | 91.50 (82.25–98.00)                | 19           | 90.00 (81.00–100.75)               | 6            | -0.166             | Mann-Whitney test   | 0.868 |
| INR, median (IQR)          | 1.06 (1.01–1.14)                   | 18           | 1.07 (0.99–1.14)                   | 6            | -0.051             | Mann-Whitney test   | 0.959 |
| Fg, g/L, median (IQR)      | 4.25 (3.40–5.36)                   | 18           | 4.33 (3.62–5.75)                   | 6            | -0.82              | Mann-Whitney test   | 0.412 |
| APTT, s, median (IQR)      | 37.80 (35.25–41.10)                | 18           | 38.40 (36.00–41.05)                | 6            | -0.742             | Mann-Whitney test   | 0.458 |
| TT, s, median (IQR)        | 16.60 (15.75–17.50)                | 18           | 16.70 (15.83–17.70)                | 6            | -0.285             | Mann-Whitney test   | 0.776 |

|                          |                      |    |                     |    |        |                     |       |
|--------------------------|----------------------|----|---------------------|----|--------|---------------------|-------|
| D dimer, median (IQR)    | 0.79 (0.32–2.47)     | 23 | 0.58 (0.36–2.95)    | 10 | -0.296 | Mann-Whitney test   | 0.767 |
| FDP, µg/mL, median (IQR) | 4.00 (4.00–9.20)     | 34 | 4.00 (4.00–9.875)   | 14 | -0.180 | Mann-Whitney test   | 0.857 |
| ATIII, %, median (IQR)   | 92.00 (81.00–101.00) | 37 | 91.00 (85.00–98.00) | 14 | -0.355 | Mann-Whitney test   | 0.722 |
| <b>Complications</b>     |                      |    |                     |    |        |                     |       |
| RF, n (%)                | 23 (7.9%)            | 0  | 3 (4.5%)            | 0  | -      | Fisher's exact test | 0.439 |
| ARDS, n (%)              | 41 (14.1%)           | 0  | 10 (15.2%)          | 0  | 0.05   | Chi-square tests    | 0.824 |
| AMI, n (%)               | 54 (18.6%)           | 0  | 8 (12.1%)           | 0  | 1.553  | Chi-Square tests    | 0.213 |
| ALI, n (%)               | 63 (21.6%)           | 0  | 12 (18.2%)          | 0  | 0.39   | Chi-Square tests    | 0.532 |
| AKI, n (%)               | 29 (10.0%)           | 0  | 10 (15.2%)          | 0  | 1.487  | Chi-Square tests    | 0.223 |
| Septic shock, n (%)      | 17 (5.8%)            | 0  | 7 (10.6%)           | 0  | -      | Fisher's exact test | 0.175 |
| MODS, n (%)              | 3 (1.0%)             | 0  | 0 (0.0%)            | 0  | -      | Fisher's exact test | 1.000 |

Note: Bold values represent statistically significant P values.

Abbreviations: PT, prothrombin time; PTA, prothrombin activity; INR, international normalized ratio; Fg, fibrinogen; APTT, activated Partial thromboplastin time; TT, thrombin time; FDP, fibrinogen degradation products; AT III, antithrombin III; RF, respiratory failure; ARDS, acute respiratory distress syndrome; AMI, acute myocardial injury; ALI, acute liver injury; AKI, acute kidney injury; MODS, multiple organ dysfunction syndrome; IQR, interquartile range.

**Supplementary Table S3. Univariate and multivariate logistic regression analysis between fasting blood glucose and incidence of main symptoms and important complications in COVID-19 patients.**

| Characteristic                   | Crude OR (95% CI) | P                | Adjust OR (95% CI) | P            |
|----------------------------------|-------------------|------------------|--------------------|--------------|
| <b>Main symptoms of COVID-19</b> |                   |                  |                    |              |
| Cough                            | 1.04 (0.94–1.15)  | 0.427            | -                  | -            |
| Fever                            | 1.02 (0.94–1.12)  | 0.584            | -                  | -            |
| Expectoration                    | 1.04 (0.97–1.12)  | 0.256            | -                  | -            |
| Hemoptysis                       | 1.03 (0.85–1.26)  | 0.757            | -                  | -            |
| Shortness of breath              | 1.01 (0.95–1.09)  | 0.678            | -                  | -            |
| Pharyngalgia                     | 1.08 (1.00–1.16)  | 0.051            | -                  | -            |
| Headache                         | 0.99 (0.90–1.09)  | 0.853            | -                  | -            |
| Dizzy                            | 1.03 (0.92–1.16)  | 0.574            | -                  | -            |
| Muscular soreness                | 1.00 (0.92–1.08)  | 0.928            | -                  | -            |
| Weakness                         | 1.02 (0.96–1.09)  | 0.502            | -                  | -            |
| Pectoralgia                      | 1.03 (0.95–1.11)  | 0.531            | -                  | -            |
| Chest stuffiness                 | 1.03 (0.96–1.10)  | 0.406            | -                  | -            |
| Diarrhea                         | 1.00 (0.92–1.08)  | 0.955            | -                  | -            |
| Nausea and vomiting              | 1.02 (0.94–1.11)  | 0.624            | -                  | -            |
| Palpitation                      | 1.03 (0.86–1.24)  | 0.724            | -                  | -            |
| <b>Complications</b>             |                   |                  |                    |              |
| RF                               | 1.11 (1.03–1.21)  | <b>0.012</b>     | 1.10 (1.00–1.20)   | <b>0.041</b> |
| ARDS                             | 1.15 (1.06–1.24)  | <b>&lt;0.001</b> | 1.12 (1.04–1.21)   | <b>0.003</b> |
| AMI                              | 1.10 (1.02–1.18)  | <b>0.009</b>     | -                  | -            |
| ALI                              | 1.03 (0.96–1.11)  | 0.430            | -                  | -            |
| AKI                              | 1.14 (1.06–1.24)  | <b>0.001</b>     | 1.11 (1.03–1.20)   | <b>0.006</b> |
| Septic shock                     | 1.11 (1.02–1.20)  | <b>0.016</b>     | 1.09 (1.00–1.19)   | 0.055        |
| MODS                             | 0.87 (0.39–1.97)  | 0.741            | -                  | -            |
| <b>Death</b>                     | 1.18 (1.09–1.29)  | <b>0.001</b>     | 1.15 (1.06–1.24)   | <b>0.001</b> |

Note: Bold values represent significant P values.

Abbreviations: RF, respiratory failure; ARDS, acute respiratory distress syndrome; AMI, acute myocardial injury; ALI, acute liver injury; AKI, acute kidney injury; MODS, multiple organ dysfunction syndrome; OR, odds ratio.

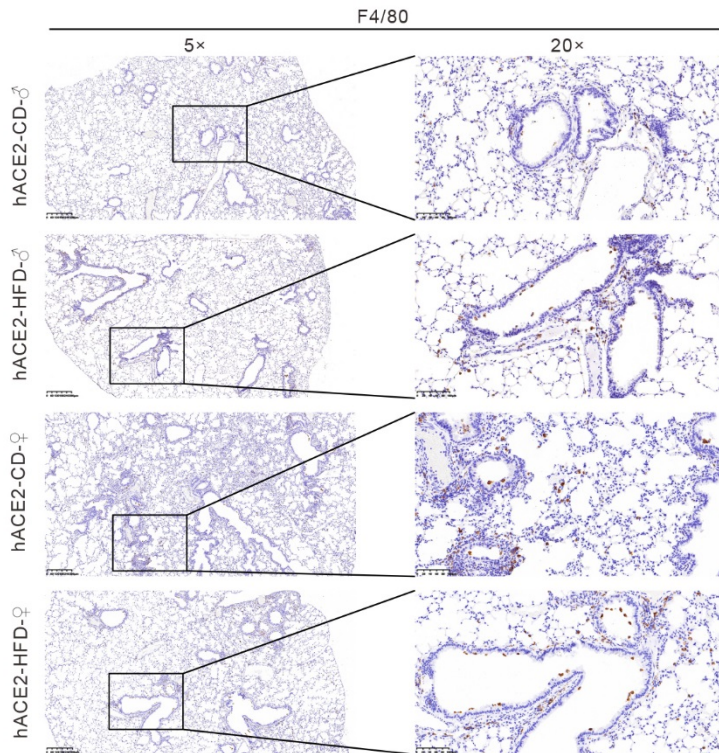

**Supplementary Figure S1 hACE2-transgenic mice are sensitive to SARS-CoV-2 infection under a chow diet (CD) and high-fat diet (HFD)**

F4/80 in lungs of hACE2-CD and hACE2-HFD mice after infection was detected using immunohistochemistry (IHC). 5×, scale bar represents 300  $\mu\text{m}$ , 20×, scale bar represents 100  $\mu\text{m}$ .

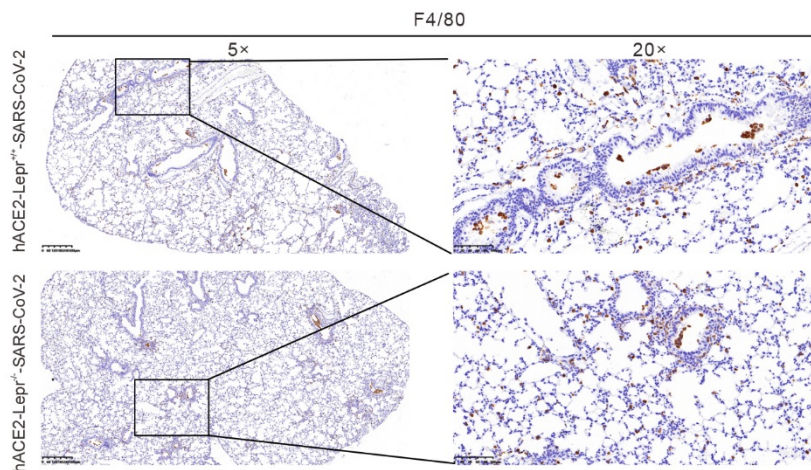

**Supplementary Figure S2 Diabetic mice exhibit more severe symptoms after SARS-CoV-2 infection**

F4/80 in lungs of hACE2-Lepr<sup>-/-</sup> and hACE2-Lepr<sup>+/+</sup> mice after infection was detected using IHC. 5×, scale bar represents 300  $\mu\text{m}$ , 20×, scale bar represents 100  $\mu\text{m}$ .
